# Supplementary material
Source: Royal Society of Chemistry journal article supplement (doi:10.1039/d5ee04503g)
Supplement: d5ee04503g1.pdf [file d5ee04503g1.pdf]

## Supplemental Information

### Advanced Pathways for Hydrogen Production: A collective view from a technical experts meeting

Katherine J. Chou,<sup>a\*</sup> Yaset Acevedo,<sup>b</sup> Peter Agbo,<sup>c</sup> Alicia Bayon,<sup>d</sup> Alexander S. Beliaev,<sup>e</sup> Haluk Beyenal,<sup>f</sup> Trevor Croft,<sup>a</sup> Amgad Elgowainy,<sup>g</sup> Daniel V. Esposito,<sup>h</sup> Christoph Falter,<sup>i</sup> David S. Ginley,<sup>j</sup> Sophia Haussener,<sup>k</sup> Shu Hu,<sup>l,m</sup> Erik Koepf,<sup>n</sup> Dhananjay Kumar,<sup>o</sup> Alon Lidor,<sup>p</sup> Bruce E. Logan,<sup>q</sup> Peter Loutzenhiser,<sup>r</sup> Anurag S. Mandalika,<sup>s</sup> PinChing Maness,<sup>a</sup> Gerald J. Meyer,<sup>t</sup> Graham J. Nathan,<sup>u</sup> Ruggero Rossi,<sup>v</sup> Ellen B. Stechel,<sup>w,x</sup> Eric R. Sundstrom,<sup>y</sup> Emily Warren,<sup>j</sup> Lynn M. Wendt,<sup>z</sup> CX Xiang,<sup>aa</sup> Anthony H. McDaniel,<sup>bb\*</sup> Frances Houle<sup>c\*</sup>

<sup>a</sup> Biosciences Center, National Laboratory of the Rockies, Golden, CO 80401, USA

<sup>b</sup> Strategic Analysis, Inc., 4075 Wilson Blvd, Suite 200, Arlington, VA 22203, USA

<sup>c</sup> Lawrence Berkeley National Laboratory, Chemical Sciences Division, 1 Cyclotron Road, Berkeley, CA 94720, USA

<sup>d</sup> Instituto de Catálisis y Petroleoquímica (ICP), CSIC, Calle de Marie Curie, 2. Madrid, 28049, Spain

<sup>e</sup> Pacific Northwest National Laboratory, Richland, WA 99354, USA

<sup>f</sup> Voiland College of Engineering and Architecture, Washington State University, Pullman, WA 99164, USA

<sup>g</sup> Argonne National Laboratory, Argonne, IL 60439, USA

<sup>h</sup> Department of Chemical Engineering, Columbia University, New York, NY 10027, USA

<sup>i</sup> Synhelion AG, Dufourstrasse 101, 8008 Zurich, Switzerland

<sup>j</sup> Materials, Chemical, and Computational Science Directorate, National Laboratory of the Rockies, Golden, CO 80401, USA

<sup>k</sup> Laboratory of Renewable Energy Science, EPFL, 1015 Lausanne, Switzerland

<sup>l</sup> Department of Chemical and Environmental Engineering, School of Engineering and Applied Sciences, Yale University, New Haven, CT 06520, USA

<sup>m</sup> Energy Sciences Institute, West Haven, CT 06516, USA

<sup>n</sup> DuPont Silicon Valley Technology Center, Sunnyvale, CA 94085

<sup>o</sup> Department of Mechanical Engineering, North Carolina Agricultural and Technical State University, Greensboro, NC 27411, USA

<sup>p</sup> Energy Conversion and Storage Systems Center, National Laboratory of the Rockies, Golden, CO 80401, USA

<sup>q</sup> Department of Civil & Environmental Engineering, Pennsylvania State University, University Park, PA 16802, USA

<sup>r</sup> George W. Woodruff School of Mechanical Engineering, Georgia Institute of Technology, Atlanta, Georgia 30332-0405, USA

<sup>s</sup> Center for Energy Studies, Louisiana State University, Baton Rouge, LA 70803, USA

<sup>t</sup> Department of Chemistry, University of North Carolina at Chapel Hill, Chapel Hill, NC 27599

<sup>u</sup> School of Electrical and Mechanical Engineering, The University of Adelaide, Adelaide, SA, 5005, Australia

<sup>v</sup> Department of Environmental Health and Engineering, Johns Hopkins University, Baltimore, MD 21210, USA

<sup>w</sup> School of Molecular Sciences Arizona State University, Tempe, AZ 85287, USA

<sup>x</sup> ASU LightWorks®, Arizona State University, Tempe, AZ 85287, USA

<sup>y</sup> Advanced Biofuel and Bioproducts Process Development Unit, Lawrence Berkeley National Laboratory, Emeryville, CA 94608, USA

<sup>z</sup> Idaho National Laboratory, Idaho Falls, ID 83415, USA

<sup>aa</sup> Department of Applied Physics and Materials Science, California Institute of Technology, Pasadena, CA 91125, USA

<sup>bb</sup> Sandia National Laboratories, Livermore, CA 94550, USA

**\*Corresponding authors:** Katherine Chou {Katherine.Chou@nlr.gov}, Anthony McDaniel {amcdani1000@gmail.com}, Frances Houle {fahoule@lbl.gov}

**Keywords:** renewable, sustainable, hydrogen production, water splitting, biomass fermentation, photoelectrochemical, biological, thermochemical cycles, metal oxide

SI Figure S1: Emerging definition of bio-hydrogen (bioH<sub>2</sub>).

SI Figure S2: Detailed process flow diagram (PFD) showing 50 MT/day BioH<sub>2</sub> production from solid food waste (SFW) through integrated dark fermentation and microbial electrolysis cell.

SI Table S1. Summary of MEC internal resistance and corresponding parameters.

SI Table S2. Data and assumptions for figure 5.

SI Table S3. Data and assumptions for figure 7.

SI Table S4. Data and assumptions for figure 8.

SI Table S5. Data and assumptions for figure 12.

SI Table S6. Material usage per  $MW_{Radiation}$  and costs in 2024 USD.

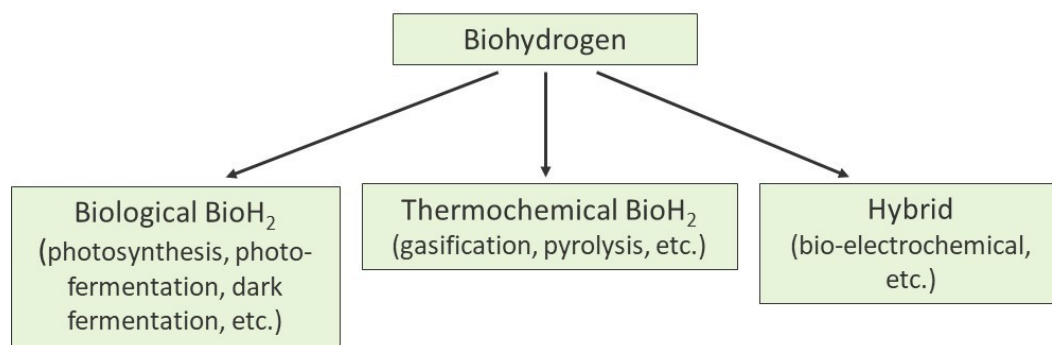

**SI Figure S1: Emerging definition of bio-hydrogen (bioH<sub>2</sub>).**

This emerging definition of bioH<sub>2</sub> encompasses a broader scope and contrasts earlier literature which limited the term bioH<sub>2</sub> to H<sub>2</sub> produced biologically by microorganisms. Biological bioH<sub>2</sub> generally refers to hydrogen production catalyzed by microbes, which include hydrogen produced from splitting water molecules through light-driven reactions by photosynthetic organisms as well as fermentative conversion of biogenic/organic and waste materials to hydrogen without any light input. Thermochemical bioH<sub>2</sub> generally refers to hydrogen produced from organic biomass through means of gasification, pyrolysis, etc. Bio H<sub>2</sub> also includes hydrogen produced from organic substances through a combination of fermentation, electrochemical, or other approaches.

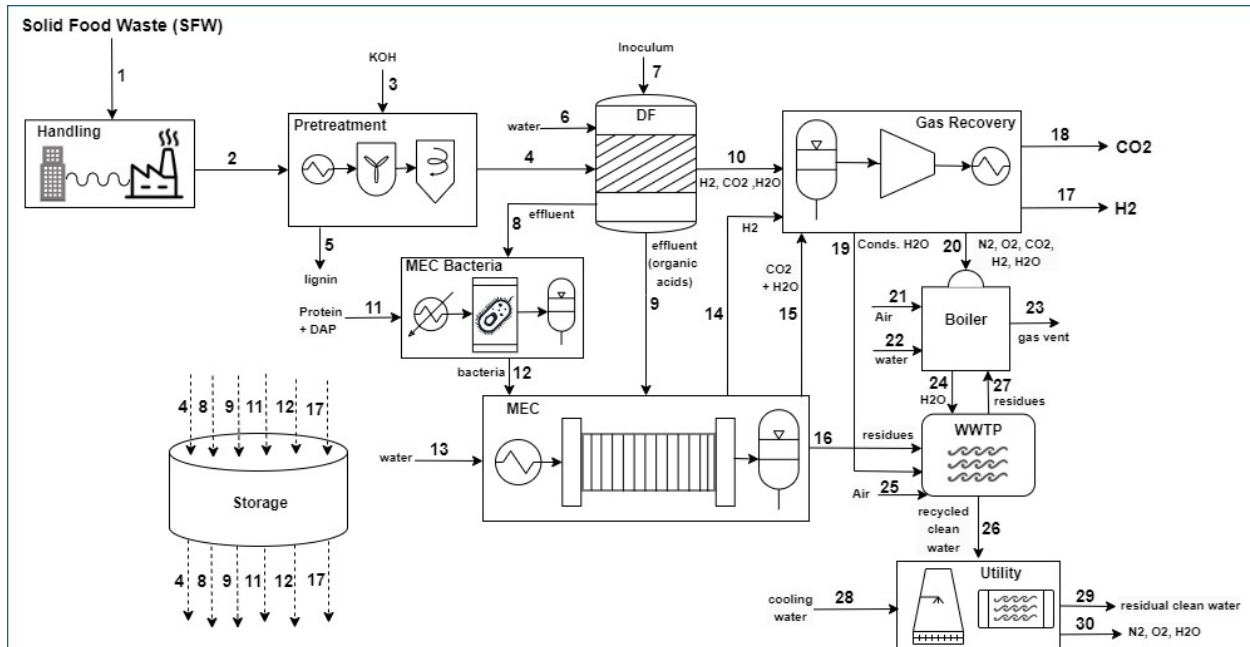

**SI Figure S2: Process flow diagram (PFD) showing 50 MT/day BioH<sub>2</sub> production from solid food waste (SFW) through integrated dark fermentation (DF) and microbial electrolysis cell (MEC).**

Figure S2 shows the process flow diagrams of 50 MT/day bioH<sub>2</sub> production process using solid food waste as a feedstock. Below is a description of the various process units:

- Handling: feedstock handling and transportation to pretreatment unit.
- Pretreatment: grinding and treating SFW with KOH to enhance the feedstock-to-H<sub>2</sub> yield. The insoluble food waste content is separated and disposed of.
- Dark fermentation (DF) and gas recovery: fermentation of the treated waste in the absence of O<sub>2</sub> to generate H<sub>2</sub>, CO<sub>2</sub>, organic acids, and other by-products, such as ethanol. The gaseous product from DF is fed to the gas recovery unit for separating CO<sub>2</sub> and H<sub>2</sub> using a Selexol unit and pressure swing adsorption (PSA).
- Microbial electrolysis cell (MEC): bacteria produced from the effluents from DF as well as protein and diammonium phosphate (DAP) are fed to MEC. The organic acids in DF effluent are utilized by microorganisms at the anode of MEC to generate electrons and protons at a low voltage. The electrons go to the cathode side and reduce protons to produce H<sub>2</sub>. The MEC effluent and remaining impurities are fed to the Wastewater treatment plant (WWTP).
- Boiler, Wastewater treatment and utility: The boiler generates steam and onsite electricity via the combustion of waste from DF and MEC. WWTP treats wastewater before its discharge to the environment, while a portion of the treated water is recirculated to meet process water requirements. The utility unit includes a cooling tower and supply of the treated water from WWTP for process requirements.
- Storage: stores process chemicals.

**SI Table S1. Summary of MEC internal resistance and corresponding parameters**

| Conditions                                          | Previous MEC | MEC Compact |
|-----------------------------------------------------|--------------|-------------|
| Solution & Membrane: $R_{\Omega}$ ( $m\Omega m^2$ ) | 14           | 0.9         |
| Anode: $R_{An}$ ( $m\Omega m^2$ )                   | 16           | 1.4         |
| Cathode: $R_{Cat}$ ( $m\Omega m^2$ )                | 22           | 5.3         |
| Total: $R_{int}$ ( $\Omega m^2$ )                   | <b>52</b>    | <b>7.6</b>  |

| Conditions                               | 28 mL | 85 L -active area |
|------------------------------------------|-------|-------------------|
| Electrode spacing (cm)                   | 1.3   | 1.3               |
| Solution cond. (mS/cm)                   | 1.2   | 1.5               |
| Solution: $R_{\Omega}$ ( $m\Omega m^2$ ) | 118   | 87                |
| Anode: $R_{An}$ ( $m\Omega m^2$ )        | 71    | 238 (3x)          |
| Cathode: $R_{Cat}$ ( $m\Omega m^2$ )     | 66    | 555 (8x)          |
| Total: $R_{int}$ ( $m\Omega m^2$ )       | 255   | 880               |
| Power ( $mW/m^2$ )                       | 304   | 101               |

SI Table S2. Data and assumptions for figure 5.

| <b>Figure 5</b>                               |                 |              |                 |                              |                 |                        |
|-----------------------------------------------|-----------------|--------------|-----------------|------------------------------|-----------------|------------------------|
| <b>Top</b>                                    |                 |              |                 |                              |                 |                        |
| <b>Panel Based</b>                            |                 |              |                 |                              |                 |                        |
| <b>Assumptions</b>                            |                 |              |                 |                              |                 |                        |
| Case                                          | -               | 1            | 2               | 3                            | 4               | 5                      |
| Label                                         | -               | 10 MTD Plant | -> 2030 Perf.   | -> 100 MTD Plant             | -> 2040 Perf.   | -> 500 MTD Plant       |
| Concept                                       | -               | Base Case    | 2030 Technology | Commercial -Scale Deployment | 2040 Technology | Large-Scale Deployment |
| Plant Capacity (Average over Lifetime)        | MTD             | 10           | 10              | 100                          | 100             | 500                    |
| Systems per Plant                             | # / plant       | 1            | 1               | 3                            | 3               | 5                      |
| Solar to Hydrogen (STH) Efficiency (BOL)      | %               | 5.5%         | 10.0%           | 10.0%                        | 25.0%           | 25.0%                  |
| Catalyst Lifetime                             | year            | 5            | 5               | 5                            | 10              | 10                     |
| Housing Lifetime                              | year            | 10           | 10              | 10                           | 20              | 20                     |
| Performance Degradation                       | % / 1000 hr     | 5.0%         | 2.5%            | 2.5%                         | 1.2%            | 1.2%                   |
| Performance Degradation                       | % / year        | 8.8%         | 4.4%            | 4.4%                         | 2.0%            | 2.0%                   |
| Average Reactor STH                           | %               | 4.3%         | 8.9%            | 8.9%                         | 22.5%           | 22.5%                  |
| Reactor Cost                                  | \$/reactor      | 300          | 300             | 300                          | 300             | 300                    |
| Refurbishment Cost                            | \$/reactor      | 100          | 100             | 100                          | 100             | 100                    |
| <b>Levelized Cost of Hydrogen</b>             |                 |              |                 |                              |                 |                        |
| Capital Costs - Direct Costs                  | 2020 \$ / kg H2 | \$1.18       | \$0.65          | \$0.59                       | \$0.32          | \$0.28                 |
| Capital Costs - Indirect Costs                | 2020 \$ / kg H2 | \$0.45       | \$0.28          | \$0.15                       | \$0.09          | \$0.06                 |
| Capital Costs - Land                          | 2020 \$ / kg H2 | \$0.52       | \$0.22          | \$0.19                       | \$0.05          | \$0.06                 |
| Capital Costs - Yearly Unplanned Replacements | 2020 \$ / kg H2 | \$0.15       | \$0.09          | \$0.07                       | \$0.04          | \$0.03                 |
| Capital Costs - Specified Replacements        | 2020 \$ / kg H2 | \$2.07       | \$1.00          | \$1.00                       | \$0.14          | \$0.14                 |
| Fixed Operating Costs - Labor                 | 2020 \$ / kg H2 | \$0.43       | \$0.46          | \$0.08                       | \$0.14          | \$0.04                 |

|                                                                    |                        |               |                 |                              |                 |                        |
|--------------------------------------------------------------------|------------------------|---------------|-----------------|------------------------------|-----------------|------------------------|
| Fixed Operating Costs - Property Tax and Insurance                 | 2020 \$ / kg H2        | \$0.69        | \$0.38          | \$0.31                       | \$0.16          | \$0.13                 |
| Fixed Operating Costs - Material Costs for Maintenance and Repairs | 2020 \$ / kg H2        | \$0.59        | \$0.33          | \$0.30                       | \$0.17          | \$0.14                 |
| Utilities - Electricity                                            | 2020 \$ / kg H2        | \$0.09        | \$0.09          | \$0.08                       | \$0.08          | \$0.07                 |
| Utilities - Water                                                  | 2020 \$ / kg H2        | \$0.01        | \$0.01          | \$0.01                       | \$0.01          | \$0.01                 |
| Decommissioning Costs                                              | 2020 \$ / kg H2        | \$0.01        | \$0.01          | \$0.01                       | \$0.00          | \$0.00                 |
| <b>Total</b>                                                       | <b>2020 \$ / kg H2</b> | <b>\$6.18</b> | <b>\$3.52</b>   | <b>\$2.78</b>                | <b>\$1.21</b>   | <b>\$0.97</b>          |
|                                                                    |                        |               |                 |                              |                 |                        |
|                                                                    |                        |               |                 |                              |                 |                        |
| <b>Figure 5</b>                                                    |                        |               |                 |                              |                 |                        |
| <b>Bottom</b>                                                      |                        |               |                 |                              |                 |                        |
| <b>Particle Based</b>                                              |                        |               |                 |                              |                 |                        |
| <b>Assumptions</b>                                                 |                        |               |                 |                              |                 |                        |
| Case                                                               | -                      | 1             | 2               | 3                            | 4               | 5                      |
| Label                                                              | -                      | 10 MTD Plant  | -> 2030 Perf.   | -> 100 MTD Plant             | -> 2040 Perf.   | -> 500 MTD Plant       |
| Concept                                                            | -                      | Base Case     | 2030 Technology | Commercial -Scale Deployment | 2040 Technology | Large-Scale Deployment |
| Plant Capacity (Average over Lifetime)                             | MTD                    | 10            | 10              | 100                          | 100             | 500                    |
| Systems per Plant                                                  | # / plant              | 1             | 1               | 3                            | 3               | 5                      |
| Solar to Hydrogen (STH) Efficiency (BOL)                           | %                      | 1.0%          | 5.0%            | 5.0%                         | 10.0%           | 10.0%                  |
| Catalyst Lifetime                                                  | year                   | 1             | 2               | 2                            | 5               | 5                      |
| Housing Lifetime                                                   | year                   | 10            | 10              | 10                           | 20              | 20                     |
| Performance Degradation                                            | % / 1000 hr            | 5.0%          | 2.5%            | 2.5%                         | 1.2%            | 1.2%                   |
| Performance Degradation                                            | % / year               | 8.8%          | 4.4%            | 4.4%                         | 2.0%            | 2.0%                   |
| Average Reactor STH                                                | %                      | 1.0%          | 4.8%            | 4.8%                         | 9.5%            | 9.5%                   |
| Reactor Cost                                                       | \$/reactor             | 50            | 50              | 50                           | 50              | 50                     |
| Refurbishment Cost                                                 | \$/reactor             | -             | -               | -                            | -               | -                      |

| <b>H2A Output - Detailed</b>                                       |                        |                |               |               |               |               |
|--------------------------------------------------------------------|------------------------|----------------|---------------|---------------|---------------|---------------|
| Capital Costs - Direct Costs                                       | 2020 \$ / kg H2        | \$<br>2.10     | \$0.56        | \$0.50        | \$0.33        | \$0.29        |
| Capital Costs - Indirect Costs                                     | 2020 \$ / kg H2        | \$1.01         | \$0.30        | \$0.16        | \$0.10        | \$0.07        |
| Capital Costs - Land                                               | 2020 \$ / kg H2        | \$2.34         | \$0.41        | \$0.35        | \$0.13        | \$0.13        |
| Capital Costs - Yearly Unplanned Replacements                      | 2020 \$ / kg H2        | \$0.29         | \$0.08        | \$0.06        | \$0.04        | \$0.03        |
| Capital Costs - Specified Replacements                             | 2020 \$ / kg H2        | \$3.50         | \$0.53        | \$0.53        | \$0.08        | \$0.08        |
| Fixed Operating Costs - Labor                                      | 2020 \$ / kg H2        | \$0.43         | \$0.46        | \$0.08        | \$0.14        | \$0.04        |
| Fixed Operating Costs - Property Tax and Insurance                 | 2020 \$ / kg H2        | \$1.56         | \$0.39        | \$0.31        | \$0.18        | \$0.16        |
| Fixed Operating Costs - Material Costs for Maintenance and Repairs | 2020 \$ / kg H2        | \$0.88         | \$0.25        | \$0.22        | \$0.15        | \$0.13        |
| Utilities - Electricity                                            | 2020 \$ / kg H2        | \$0.09         | \$0.09        | \$0.08        | \$0.08        | \$0.07        |
| Utilities - Water                                                  | 2020 \$ / kg H2        | \$0.01         | \$0.01        | \$0.01        | \$0.01        | \$0.01        |
| Decommissioning Costs                                              | 2020 \$ / kg H2        | \$0.02         | \$0.01        | \$0.00        | \$0.00        | \$0.00        |
| <b>Total</b>                                                       | <b>2020 \$ / kg H2</b> | <b>\$12.23</b> | <b>\$3.08</b> | <b>\$2.32</b> | <b>\$1.24</b> | <b>\$1.02</b> |

SI Table S3. Data and assumptions for figure 7.

| Figure 7a              |                                      |               |                          |             |                      |       |
|------------------------|--------------------------------------|---------------|--------------------------|-------------|----------------------|-------|
| Levelized Cost (\$/kg) |                                      |               |                          |             |                      |       |
|                        | Discharge/<br>Tipping Fee<br>Credits | Capital Costs | Decommissioning<br>Costs | Fixed O & M | Other Variable Costs | Taxes |
| CW<br>US mix<br>CCS    | -5.6                                 | 5.5           | 0                        | 2.2         | 3.4                  | 0.22  |
| CW<br>RE<br>CCS        | -6.3                                 | 5.5           | 0                        | 2.2         | 3.4                  | 0.21  |
| SFW<br>US mix<br>CCS   | -11.3                                | 5.5           | 0                        | 2.2         | 3.4                  | 0.22  |
| SFW<br>RE<br>CCS       | -2.9                                 | 6.4           | 0                        | 2.5         | 3.0                  | 0.19  |

| Figure 7b                            |       |                    |           |         |     |     |
|--------------------------------------|-------|--------------------|-----------|---------|-----|-----|
| Well-to-Gate Emissions (kgCO2e/kgH2) |       |                    |           |         |     |     |
|                                      | CCS   | Onsite Electricity | Nutrients | KOH(PT) | DAP | CSL |
| CW<br>US mix<br>CCS                  | -10.9 | 9.5                | 2.3       | 0       | 0   | 0   |
| CW<br>RE<br>CCS                      | -10.9 | 0                  | 2.3       | 0       | 0   | 0   |
| SFW<br>US mix<br>CCS                 | -10.9 | 11.3               | 0         | 2.9     | 0   | 0   |
| SFW<br>RE<br>CCS                     | -10.9 | 0                  | 0         | 2.9     | 0   | 0   |
| NG SMR                               | 9.3   |                    |           |         |     |     |
| NG SMR CCS                           | 3.2   |                    |           |         |     |     |
| PEM US Mix                           | 26    |                    |           |         |     |     |

**SI Table S4. Data and assumptions for figure 8.**

|                                                                                                    |                               |      |             |
|----------------------------------------------------------------------------------------------------|-------------------------------|------|-------------|
| Currently achieved                                                                                 |                               | 12.4 | 0           |
| Membrane price                                                                                     | \$500 to \$300/m <sup>2</sup> | 11.5 | 0.890681016 |
|                                                                                                    | \$300 to \$100/m <sup>2</sup> | 10.6 | 0.890681016 |
| Electrode price                                                                                    | \$200 to \$100/m <sup>2</sup> | 9.7  | 0.890184694 |
|                                                                                                    | \$100 to \$50/m <sup>2</sup>  | 9.3  | 0.445092347 |
| MEC current density                                                                                | 66 to 300 A/m <sup>2</sup>    | 7.5  | 1.771371412 |
|                                                                                                    | 300 to 500 A/m <sup>2</sup>   | 7.3  | 0.199348563 |
| Electricity price                                                                                  | ¢7 to ¢3.5/kWh                | 6.4  | 0.916271221 |
| Corn stover price                                                                                  | \$96 to \$48/tonne            | 5.6  | 0.799088674 |
| Potential tipping and discharge fees obtained from solid food waste (SFW) & cheese wastewater (CW) | Tipping fees \$0.03/kg SFW    | 1.7  | 3.876124422 |
|                                                                                                    | Discharge fees \$0.06/kg CW   | -0.8 | 2.5         |

**SI Table S5. Data and assumptions for figure 12.**

| Cost Category                 | Unit                                | Baseline Variable | Target Variable | Waterfall Energy Cost (\$ per metric ton) | Waterfall Conversion Capital (\$ per metric ton) | Total Levelized Cost of H2 (\$ per metric ton) |
|-------------------------------|-------------------------------------|-------------------|-----------------|-------------------------------------------|--------------------------------------------------|------------------------------------------------|
| Baseline Costs                | \$ per metric ton                   |                   |                 | 5070.6                                    | 1528.7                                           | 6599.3                                         |
| material                      | \$ per MW_radiation                 | 189,300           | 125,000         | 3348.3                                    | 1528.7                                           | 4877.0                                         |
| multiple_radiation            | -                                   | 5                 | 2               | 1339.3                                    | 1528.7                                           | 2868.0                                         |
| discount rate                 | % per year                          | 9%                | 7%              | 1170.4                                    | 1343.2                                           | 2513.6                                         |
| lifetime                      | years                               | 25                | 30              | 1115.2                                    | 1282.6                                           | 2397.8                                         |
| fixed OpEx_radiation          | % per year                          | 2.50%             | 1.50%           | 1009.6                                    | 1282.6                                           | 2292.2                                         |
| energy utilization            | MWh_radiation per metric ton        | 100               | 80              | 807.7                                     | 1282.6                                           | 2090.3                                         |
| material intensity_conversion | metric ton per cubic meter          | 2                 | 1.5             | 807.7                                     | 962                                              | 1769.7                                         |
| material cost_conversion      | \$ per metric ton                   | 5000              | 2500            | 807.7                                     | 481                                              | 1288.7                                         |
| multiple_conversion           | -                                   | 6                 | 4               | 807.7                                     | 320.7                                            | 1128.4                                         |
| deltaDelta per atom           | mole H2 per mole atom MOx per cycle | 0.01              | 0.015           | 807.7                                     | 213.8                                            | 1021.5                                         |
| cycles per hour               | per hour                            | 6                 | 8               | 807.7                                     | 160.3                                            | 968.0                                          |
| active fraction               | -                                   | 0.17              | 0.2             | 807.7                                     | 136.3                                            | 944.0                                          |
| capacity factor_conversion    | hours per year                      | 2000              | 2200            | 807.7                                     | 123.9                                            | 931.6                                          |
| fixed OpEx_conversion         | % per year                          | 3%                | 2%              | 807.7                                     | 112.7                                            | 920.4                                          |

## TCH Technoeconomic Considerations and Cost Drivers

Thermochemical hydrogen (TCH) systems present a promising long-term pathway for clean hydrogen production, particularly in regions with abundant high-temperature renewable or nuclear heat. A robust technoeconomic analysis (TEA) framework is essential to guide developments and benchmark TCH alongside electrolysis and other emerging pathways. Recent TEA studies have identified several key cost drivers and performance parameters that determine the levelized cost of hydrogen (LCOH<sub>2</sub>):

- Redox Material Cost and Performance: Material degradation, material costs, redox capacity, and fast kinetics along with financial recovery factors significantly influence system cost, system longevity and replacement costs.
- Reactor Efficiency and Heat Management: High-temperature operation (>1500 °C) imposes strict demands on reactor design, materials, and insulation. Without efficient heat recuperation, solar-to-hydrogen conversion efficiencies remain low <6%, and energy consumption can exceed 150 kWh<sub>th</sub> kg<sup>-1</sup> H<sub>2</sub>. Achieving low energy utilization—on par with electrolysis—requires better thermal integration and good heat recovery.
- Capital Intensity and Scale: Capital expenditures are dominated by the receiver-reactor subsystem and heliostat field. Unlike electrolysis, TCH has no fuel cost if powered directly from concentrated solar and minimal O&M, but it must spread capital over fewer annual full-load hours unless capacity factors can improve through part load efficiency gains or thermal storage is achieved.
- System Configuration and Flexibility: The two-step nature of redox cycles allows for intrinsic separation of hydrogen and oxygen, avoiding downstream gas separation costs of H<sub>2</sub> from O<sub>2</sub>. Furthermore, TCH systems can be coupled with gas storage to decouple hydrogen input to downstream processing from the solar input, enabling flexible operation without requiring thermal energy storage at extreme temperatures.
- Deployment Strategy: TCH may be most competitive when co-located with syngas- or hydrogen-based chemical production (e.g., ammonia, methanol, dimethyl ether, liquid (drop-in) hydrocarbons), where hydrogen is immediately consumed, and heat integration is feasible. These industrial synergies can improve overall process economics and energy utilization.

## Levelized Cost of Solar Radiation Delivered (LCOSR)

The solar radiation delivery subsystem comprises only the heliostat field and the tower for a concentrating solar plant. To determine the Levelized Cost of Solar Radiation (LCOSR)

$$LCOSR = CAPEX (USD/MW_{Radiation}) \times \frac{\left( CRF \left( \frac{1}{yr} \right) + Fixed\ O\&M \left( \frac{1}{yr} \right) \right)}{Capacity\ Factor\ (hr/yr)}$$

### Inputs

- CAPEX (heliostat + tower only): \$946,500 per MW<sub>radiation</sub> delivered at the aperture of the receiver

- CRF: e.g., 10.2% (lifetime(n)=25 years @ discount rate (r)=9%)  $CRF = \frac{r(1+r)^n}{(1+r)^n - 1}$
- Fixed O&M: 2.5% of CAPEX
- Capacity factor: 2,367 hours per year (or 27%)

Result: LCOSR=50.8  $USD/MWh_{Radiation}$  or 14.1  $USD/GJ$

### **Capacity Factor and DNI Filtering**

Calculate the capacity factor at a given location from typical metrological year data and using a DNI threshold:

$$Capacity\ Factor = \frac{1}{DNI_{DP}} \sum_{j=1}^{8760} DNI_j \times H(DNI_j - DNI_{cutoff})$$

### **Inputs**

- $DNI_{DP}$  is the design point DNI, typically  $\frac{1000\ W}{m^2}$
- $DNI_{cutoff} \approx 300-400\ W/m^2$  and  $H(x) = 1$  if  $x \geq 0$ , 0 otherwise
- Material Intensity and CAPEX Breakdown

**SI Table S6. Material usage per  $MW_{Radiation}$  and costs in 2024 USD.**

| Material | Intensity (metric ton/ $MW_{Radiation}$ ) | Unit Cost (USD/metric ton) | Cost Contribution (USD/ $MW_{Radiation}$ ) |
|----------|-------------------------------------------|----------------------------|--------------------------------------------|
| Steel    | 100                                       | \$750                      | \$ 75,000                                  |
| Aluminum | 25                                        | \$2100                     | \$ 52,500                                  |
| Copper   | 3                                         | \$8600                     | \$ 25,800                                  |
| Glass    | 60                                        | \$300                      | \$ 18,000                                  |
| Concrete | 150                                       | \$120                      | \$ 18,000                                  |
| Total    | 338                                       | \$547                      | \$189,300                                  |

These material costs account for \$189,300/  $MW_{Radiation}$ . The final installed CAPEX of \$946,500/  $MW_{Radiation}$  is reached through the additive contributions of fabrication, transport, installation, EPC, and contingency assuming that the material costs are 20% of total given the simplicity of this subsystem relative to a full concentrating solar plant, which is ~10-15% and comparable to PV at ~20-30%. Factoring in the materials also facilitates doing lifecycle analyses.

### Levelized Hydrogen Conversion Cost (LCOHC)

This subsystem begins at the receiver/reactor aperture and includes everything to produce hydrogen given the energy input. Calculate LCOHC similarly to :

$$LCOHC_{CAPEX}(USD/metric\ ton\ H_2) = CAPEX(USD/MW_{H_2}) \times \frac{\left( CRF\left(\frac{1}{yr}\right) + Fixed\ O\&M\left(\frac{1}{yr}\right) \right)}{Capacity\ Factor\ (hr/yr)} \times \frac{32.7\ MWh_{H_2}}{metric\ ton\ H_2}$$

Here the hydrogen yield is based on Gibbs free energy. Other choices can be used as long as the definition of the CAPEX is consistent. Here we define:

$$Mass\ Energy\ Conversion\ (EC) = \frac{32.7\ MWh_{H_2}}{metric\ ton\ H_2}$$

Determine the energy cost using this conversion factor from delivered energy to  $H_2$  using:

$$LCOHC_{ENERGY} = EUF \left( \frac{MWH}{metric\ ton\ H_2} \right) \times LCOSR$$

$$EUF = 100 \frac{MWH}{metric\ ton\ H_2}$$

Where EUF stands for energy utilization factor. Here we assume that  $EUF = 100 \frac{MWH}{metric\ ton\ H_2}$  or ~41% from delivered radiation to hydrogen.

Result: 
$$LCOHC_{ENERGY} = \frac{USD\ 5080}{metric\ ton\ H_2}$$

With these assumptions the cost of the energy is ~ \$5/kg H<sub>2</sub>. Improving on this estimate would require either a lower levelized cost of heat and/or a lower energy utilization factor.

### CAPEX for the Conversion Subsystem

$$CAPEX \left( \frac{USD}{MW_{H_2}} \right) = \frac{Material\ Intensity \left( \frac{metric\ ton}{m^3} \right) \times Material\ Cost \left( \frac{USD}{metric\ ton} \right)}{Power\ Density \left( \frac{MW_{H_2}}{m^3} \right)} \times multiplier$$

Here volume refers to that of the receiver/reactor, encompassing the reduction, solid-solid heat recuperation, and re-oxidation. However, the material intensity includes downstream heat exchangers and separations normalized to the receiver/reactor volume. Decomposing the cost

$$Power\ Density \left( \frac{MW_{H_2}}{m^3} \right) = \frac{\Delta\delta/N_A \times cycles/hour}{f_{Active}} \times \frac{Molar\ Energy\ Conversion \left( \frac{MWh}{mol_{H_2}} \right)}{Molar\ Atomic\ Volume \left( \frac{m^3}{mol_{Atoms}} \right)}$$

The higher the *Power Density*, the lower the cost. The *Power Density* scales linearly with  $\Delta\delta/N_A$  and *cycles/hour* and inversely with the active solid fraction. The remaining terms involve a constant conversion factor and the molar volume per atom of active material. Like the molar heat capacity per atom, the molar volume per atom does not vary significantly and therefore can be estimated for most purposes.

### Inputs

- Material Intensity:  $2 \text{ metric ton} / m^3$
- Material Cost:  $USD\ 5000 / \text{metric ton}$
- Multiplier: 6
- Power Density:  $0.1 \text{ MW}_{H_2} / m^3$
- CRF: same as above 10.2%
- Fixed O&M: 3% of CAPEX

- Capacity factor: 2000 hours per year (or 22.8%)

$$\text{Result: CAPEX} = \text{USD } 600,000 / \text{MW}_{\text{H}_2}; \text{ LCOHC}_{\text{CAPEX}} = \text{USD } 1295 / \text{metric ton H}_2$$

### **Capacity Factor for H<sub>2</sub> Conversion Subsystem**

Assuming no thermal storage, the hydrogen production subsystem operates synchronously with the energy delivery system. However, the capacity needs to reflect that the productivity is not linear with DNI, since the energy losses are essentially independent of DNI, dominated by re-radiation and convective losses. Hence, the efficiency is generally a decreasing function with DNI.

$$\text{Capacity Factor} = \left( \frac{1}{\varepsilon_{DP} \times \text{DNI}_{DP}} \right) \times \sum_{j=1}^{8760} [\varepsilon(\text{DNI}_j) \times \text{DNI}_j \times H(\text{DNI}_j - \text{DNI}_{\text{cutoff}})]$$

### References

IEA (2023). Technology Roadmap: Solar Thermal Electricity. IEA, Paris.

Loh, H. P., Lyons, J., Lyons, J., and White, C. W. 2002). Process Equipment Cost Estimation, Final Report. doi:10.2172/797810

Mehos, M., Turchi, C., Jorgenson, J., Denholm, P., Ho, C., and Armijo, K. (2016), On the Path to SunShot: Advancing Concentrating Solar Power Technology, Performance, and Dispatchability. NNREL/TP-5500-65688 and SAND2016-2237R. (Technical report). Golden, CO and Albuquerque, NM: National Renewable Energy Laboratory and Sandia National Laboratories. <http://www.nrel.gov/docs/fy16osti/65688.pdf>

Mendelsohn, M., Lowder, T., and Canavan, B. (2012). Utility-Scale Concentrating Solar Power and Photovoltaic Projects: A Technology and Market Overview. Natl. Renew. Energ. Lab. Tech. Rep. NREL/TP-6A20-51137. doi:10.2172/1039803

National Renewable Energy Laboratory (2008). Data From: National Solar Radiation Data Base. Available at: [http://rredc.nrel.gov/solar/old\\_data/nsrdb/1991-2005/tmy3/by\\_state\\_and\\_city.html](http://rredc.nrel.gov/solar/old_data/nsrdb/1991-2005/tmy3/by_state_and_city.html), <https://nsrdb.nrel.gov/data-sets/archives.html>.

J. Kim, J. E. Miller, C. T. Maravelias, and E. B. Stechel, “Comparative analysis of environmental impact of S2P (Sunshine to Petrol) system for transportation fuel production,” Appl. Energy, vol. 111, pp. 1089–1098, 2013.

D. Graf, N. Monnerie, M. Roeb, M. Schmitz, and C. Sattler, “Economic comparison of solar hydrogen generation by means of thermochemical cycles and electrolysis,” Int. J. Hydrogen Energy, vol. 33, no. 17, pp. 4511–4519, 2008.

J. Kim, C. A. Henao, T. A. Johnson, D. E. Dedrick, J. E. Miller, E. B. Stechel, and C. T. Maravelias, "Methanol production from CO<sub>2</sub> using solar-thermal energy: Process development and techno-economic analysis," *Energy Environ. Sci.*, vol. 4, no. 9, pp. 3122–3132, 2011.

J. Kim, T. A. Johnson, J. E. Miller, E. B. Stechel, and C. T. Maravelias, "Fuel production from CO<sub>2</sub> using solar-thermal energy: System level analysis," *Energy Environ. Sci.*, vol. 5, no. 9, pp. 8417–8429, 2012.

C. Falter, V. Batteiger, and A. Sizmann, "Climate impact and economic feasibility of solar thermochemical jet fuel production," *Environ. Sci. Technol.*, vol. 50, no. 1, pp. 470–477, 2016.
